# Supplementary material for: A general strategy to enhance the alkaline stability of anion exchange membranes
Source: Royal Society of Chemistry journal article supplement (doi:10.1039/c7ta00879a), 2017-01-01
Supplement: c7ta00879a1.pdf [file c7ta00879a1.pdf]

## **Electronic Supplementary Information**

### **A General Strategy to Enhance the Alkaline Stability of Anion Exchange Membranes**

Jiajia Chen, Cunpu Li,<sup>\*</sup> Jianchuan Wang, Li Li, and Zidong Wei<sup>\*</sup>

*School of Chemistry and Chemical Engineering, Chongqing University, Chongqing, P.R. China. E-mail:*

*lcp@cqu.edu.cn, zdwei@cqu.edu.cn*

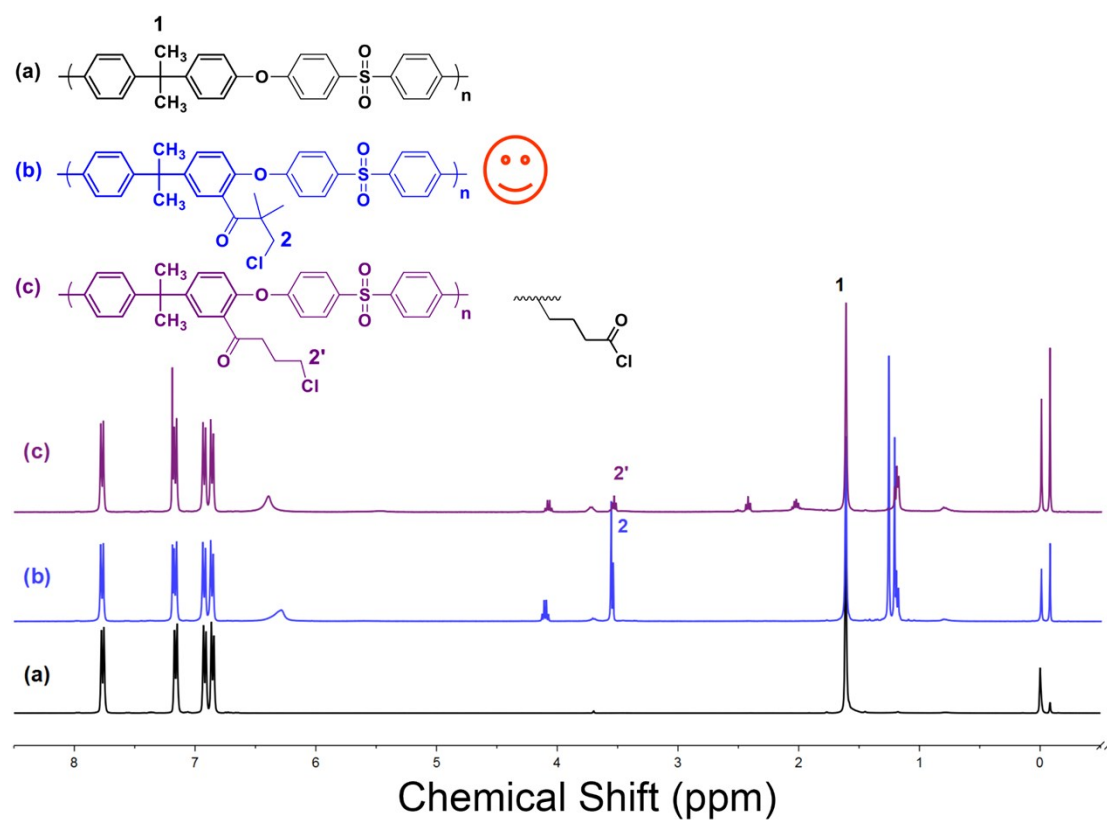

Fig. S1  $^1\text{H}$ -NMR comparison of **PSf** (a), **PSf-DPC** (b) and **PSf-BC** (c). For **PSf-BC**, almost no characteristic peak of chloromethylene (**2**) group could be found.

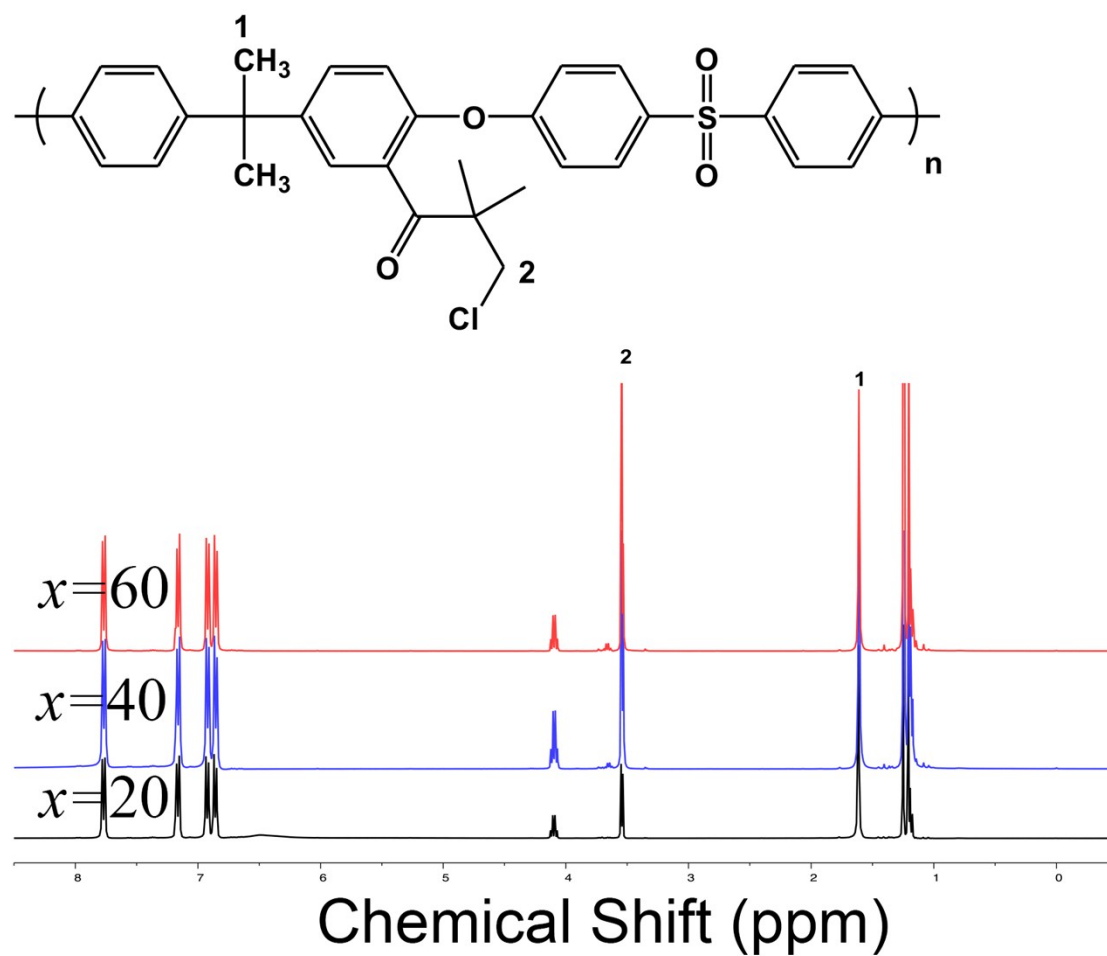

Fig. S2  $^1\text{H}$ -NMR comparison of **PSf-DPC- $x$** . DoFs were calculated by peak **1** and peak **2**, which correspond to methyl group in PSf and chloromethylene in side chain, respectively.

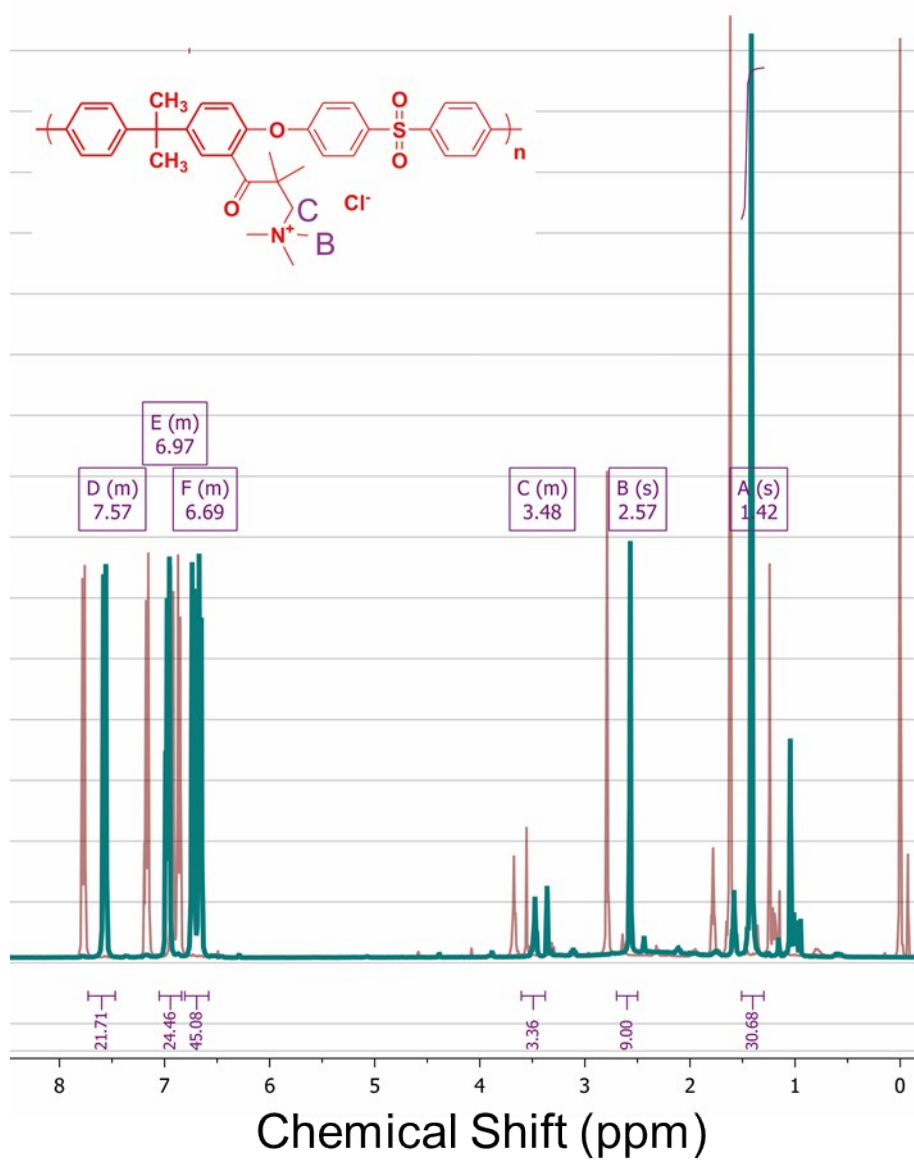

Fig. S3  $^1\text{H-NMR}$  comparison of fresh **PSf-DPC-TA-40-OH** and aged sample that after the 10-day alkaline stability test
